# Supplementary material for: A Five-Species Transcriptome Array for Oral Mixed-Biofilm Studies
Source: PubMed Central journal article supplement (PMC3237422; doi:10.1371/journal.pone.0027827), 2011-12-14
Supplement: pone.0027827.s002.pdf [file pone.0027827.s002.pdf]

Figure S2

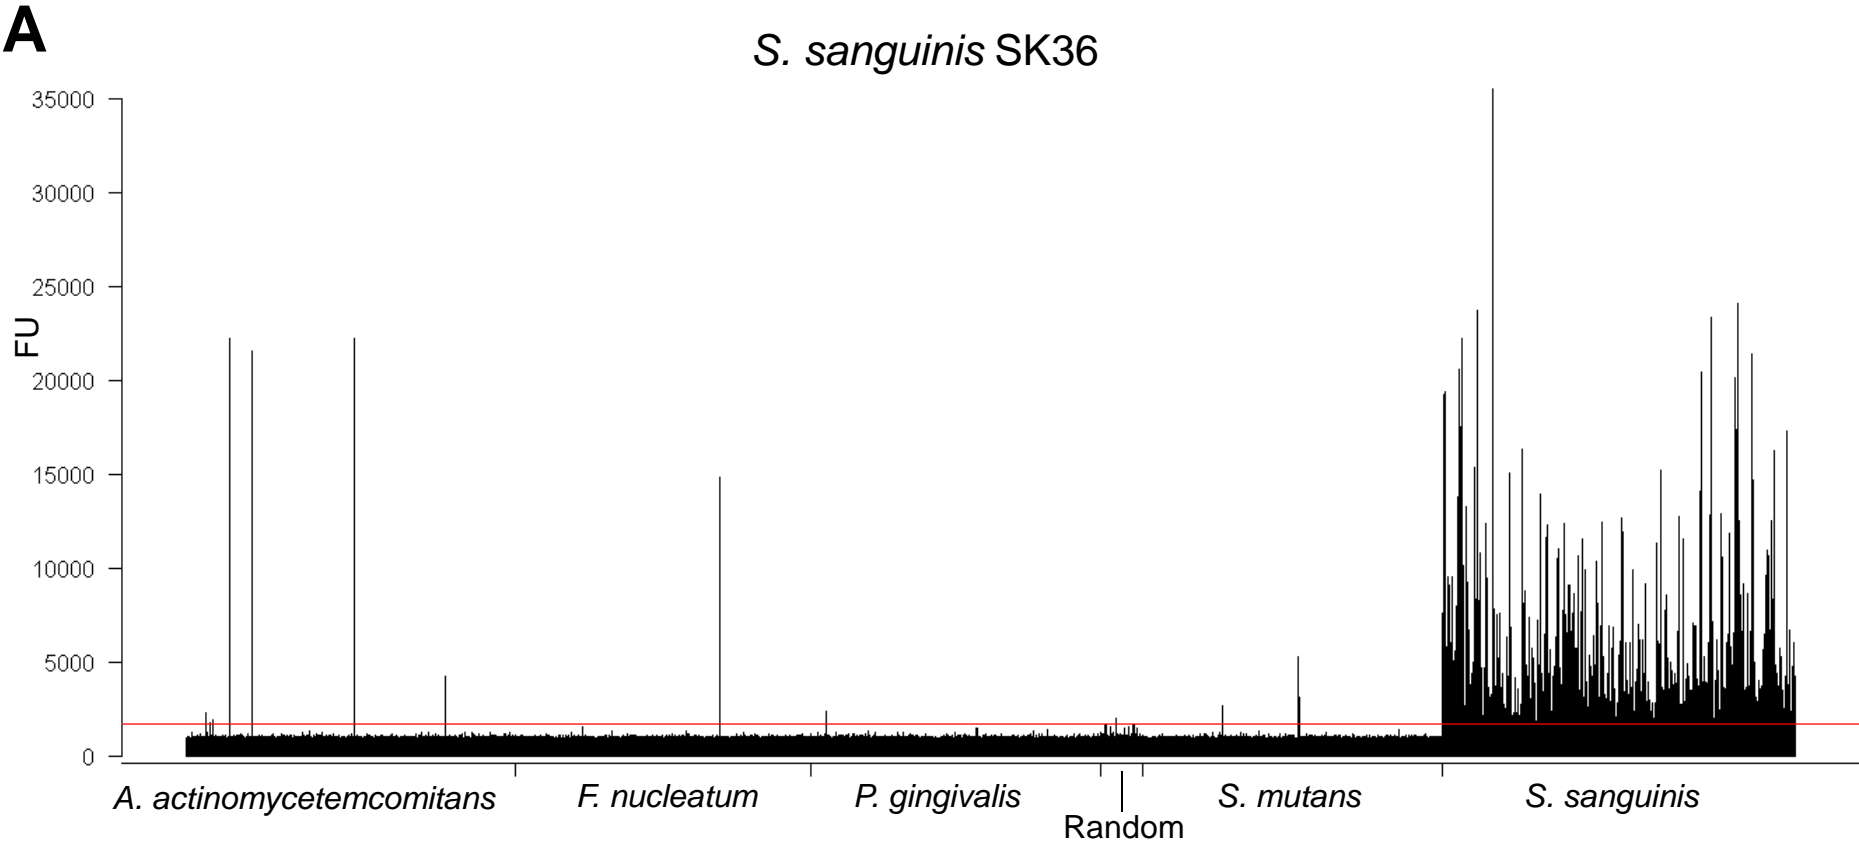

**B**

*S. mutans* UA 159

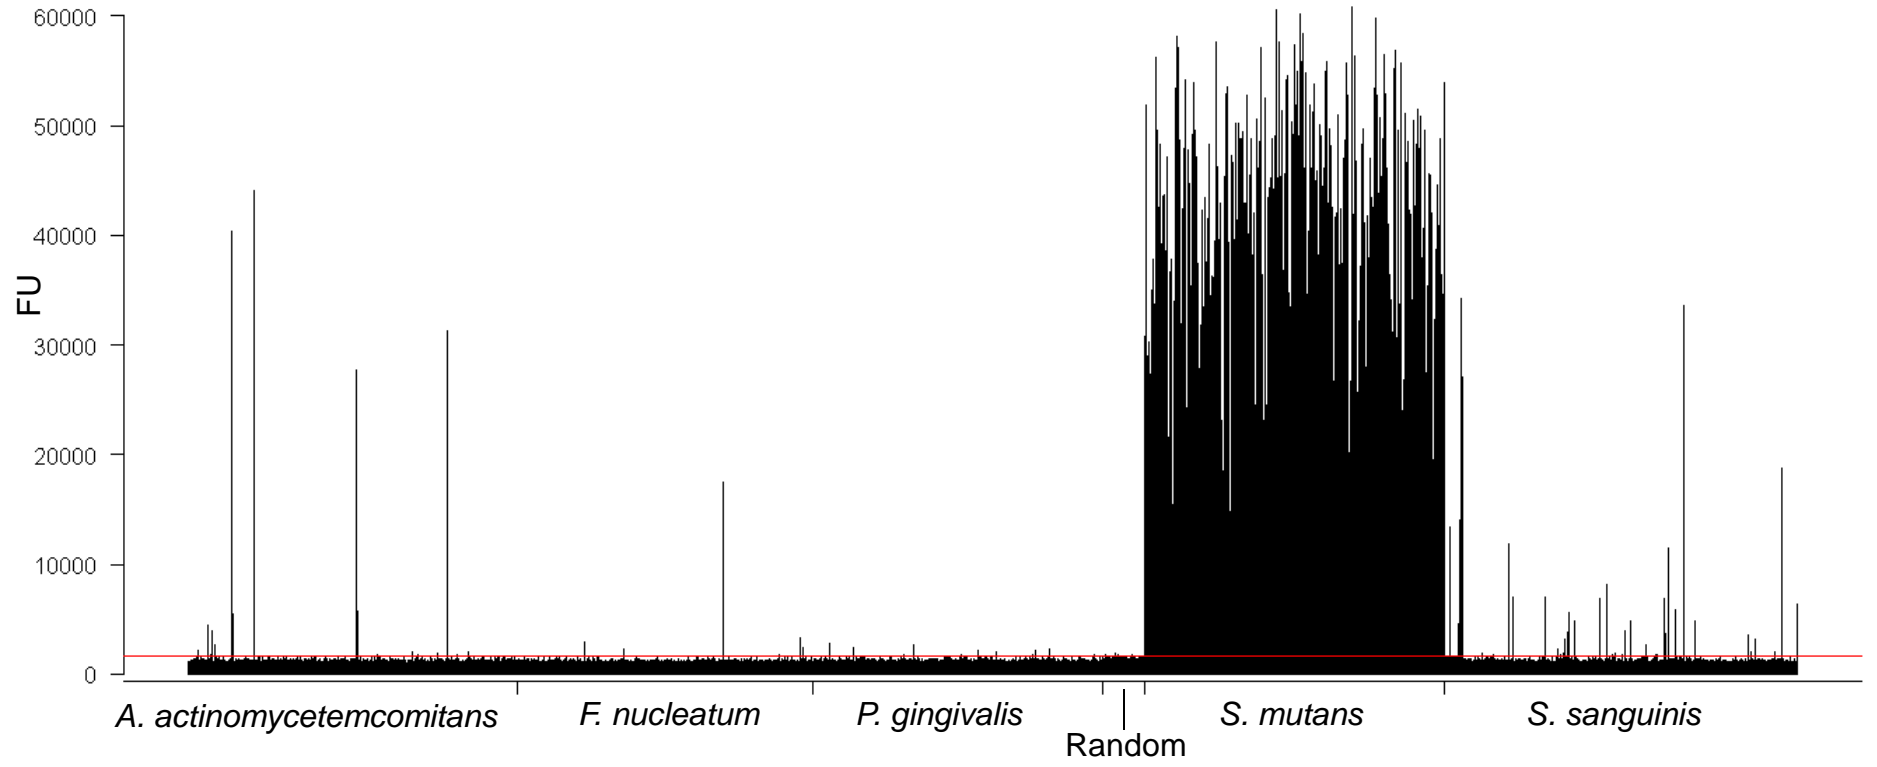

**C**

*P. gingivalis* W83

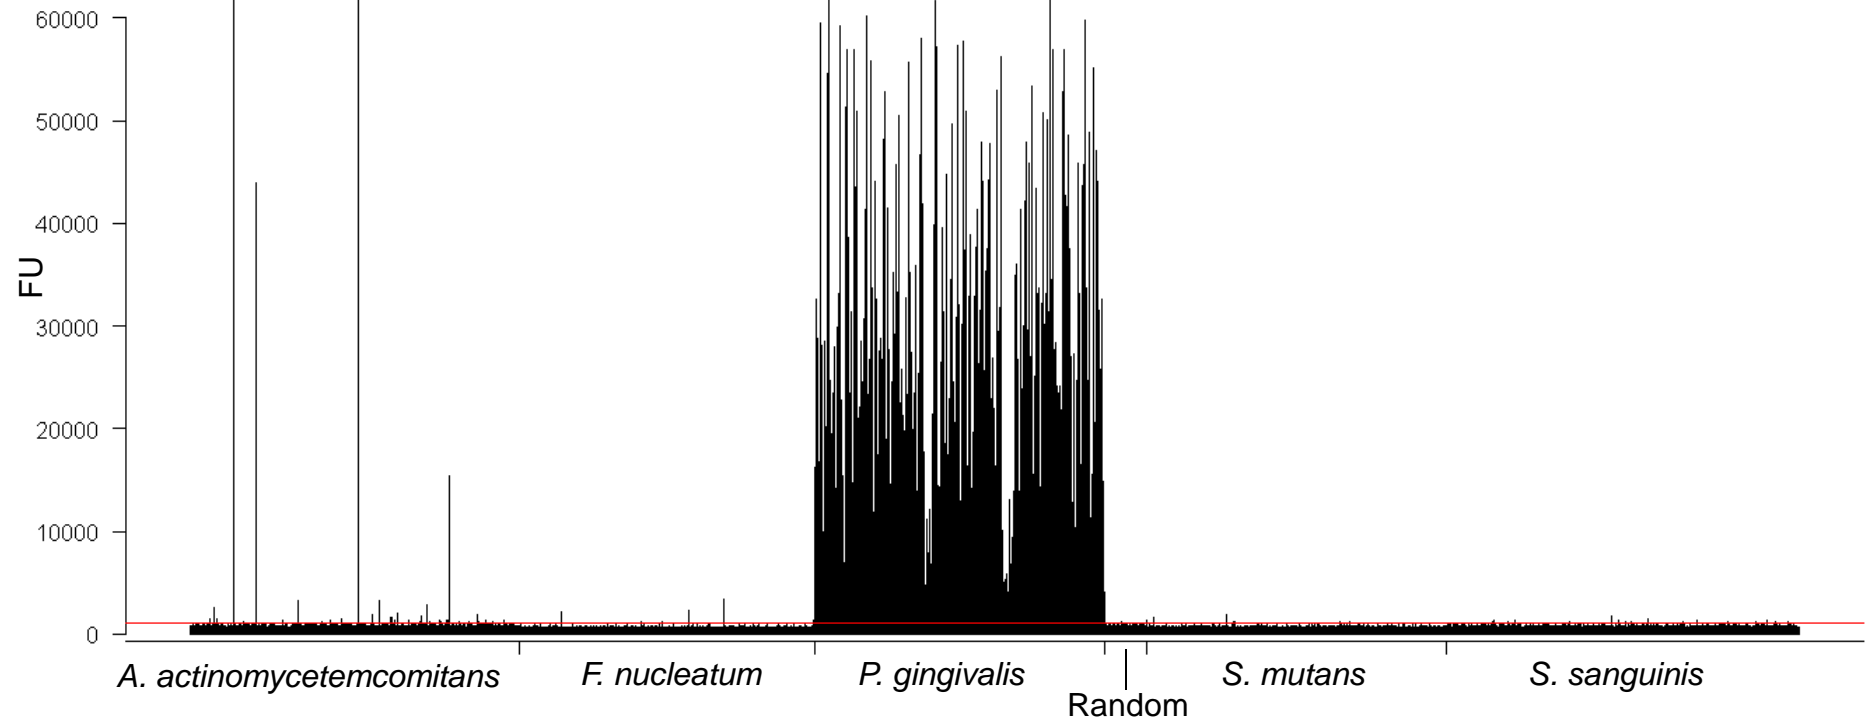

**D**

*F. nucleatum* ATCC 25586

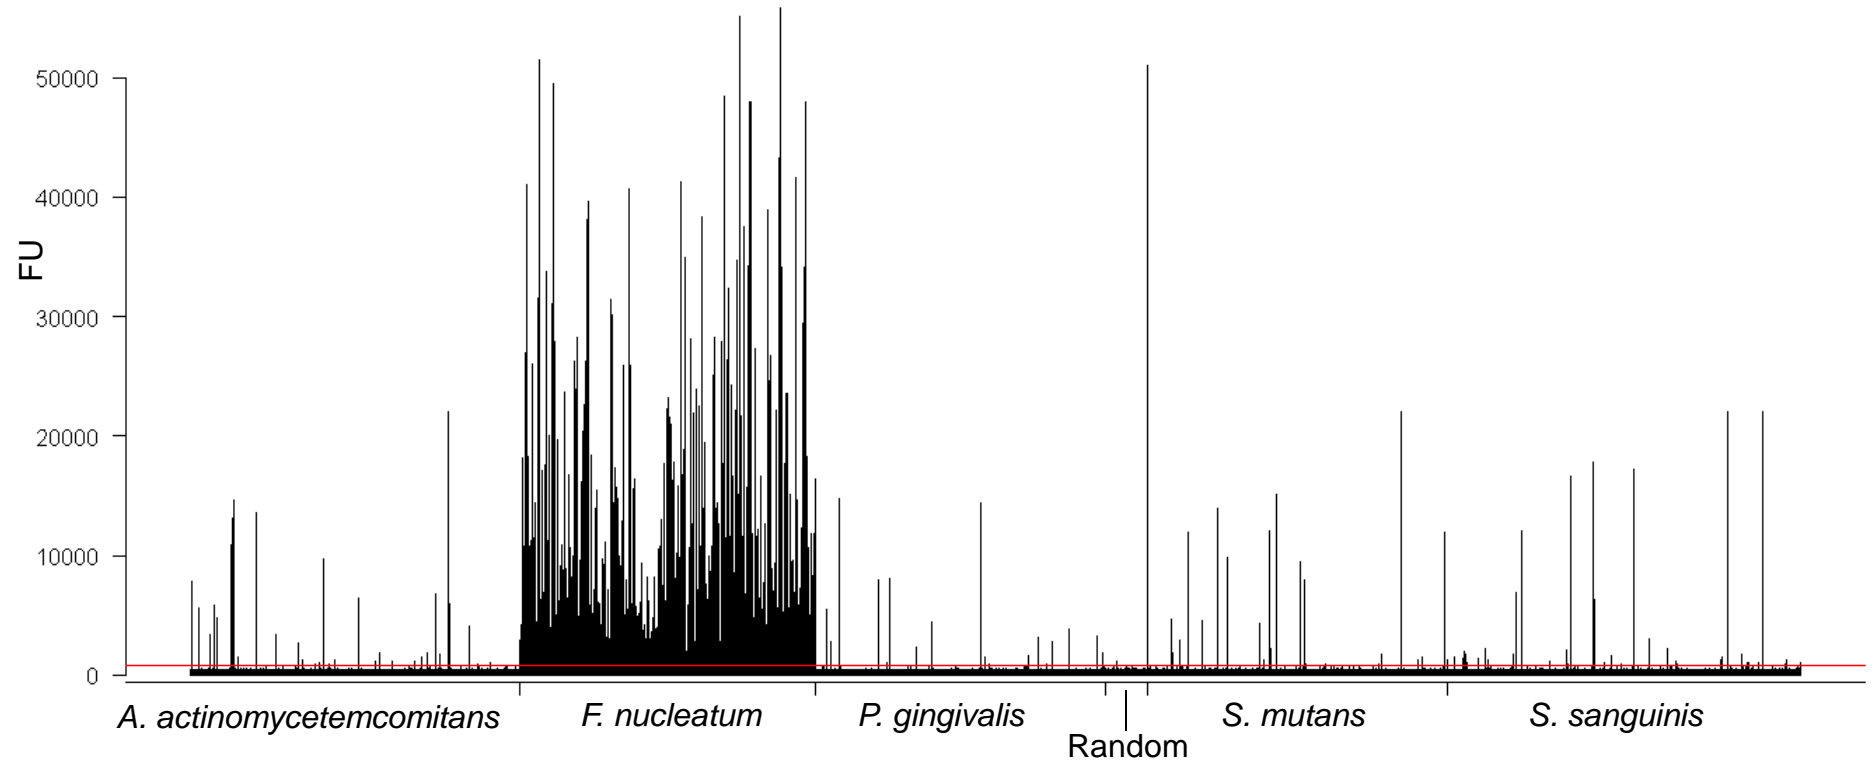

**E**

*A. actinomycetemcomitans* HK1651

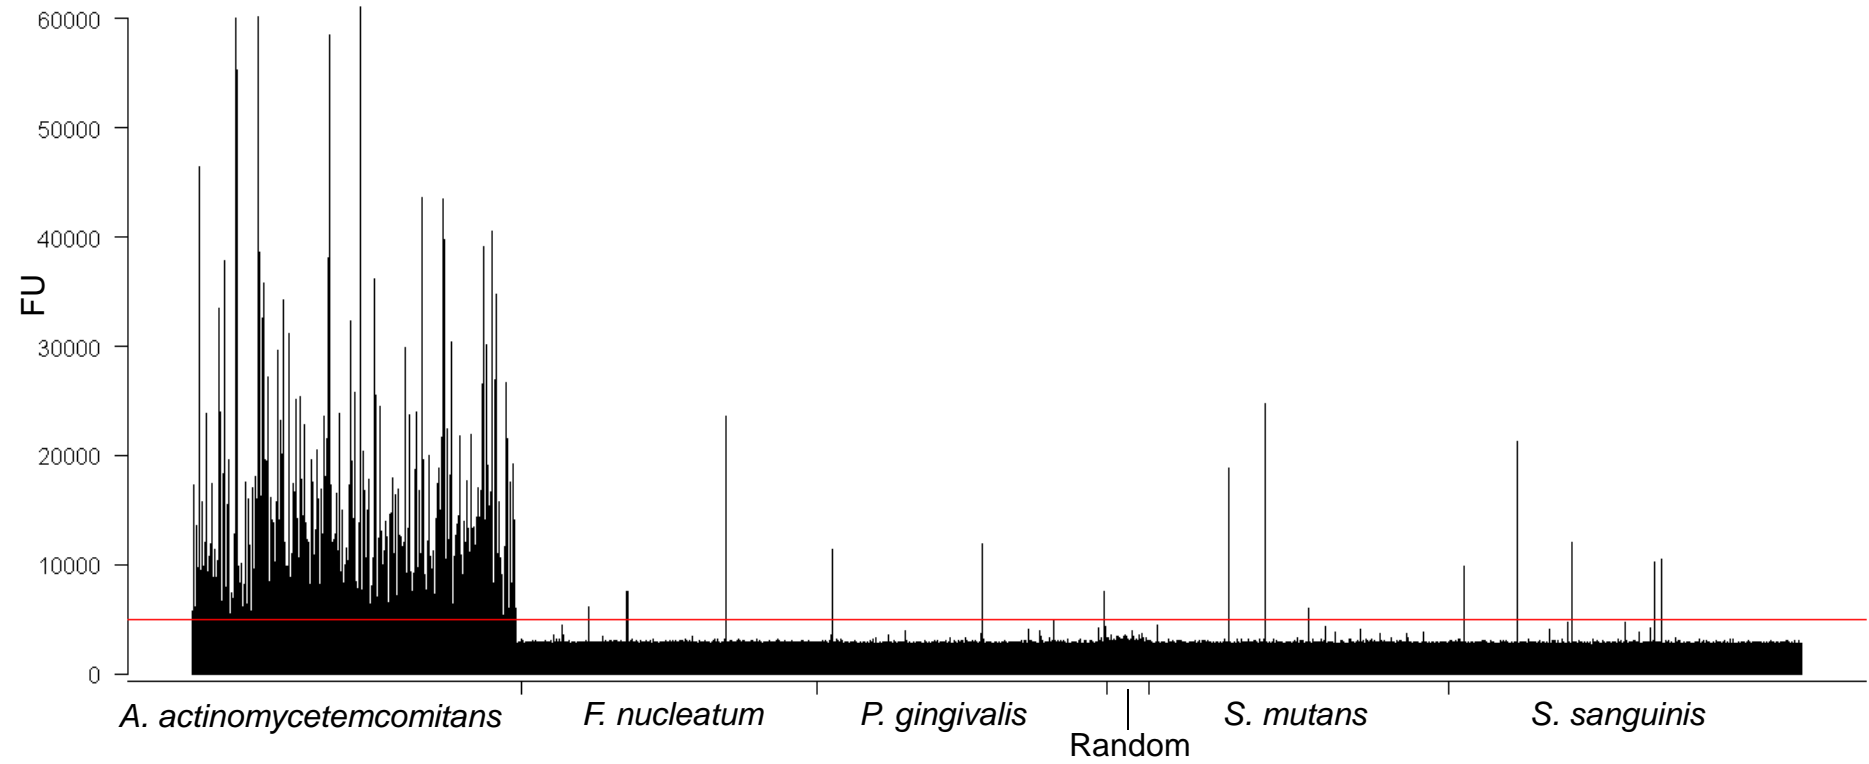

Supporting information Figure S2: Shown are the fluorescence intensities of all probes of all species represented on the array described in this study. The fluorescence intensities of all technical probe replicates were averaged after technical false positive correction.

A: Hybridization with *S. sanguinis* SK36; B: *S. mutans* UA 159; C: *P. gingivalis* W83; D: *F. nucleatum* ATCC 25586; and E: *A. actinomycetemcomitans* HK1651. The red line marks the cutoff value for the declaration of positive signals ( $2 \times$  random-mean, each).
