# Supplementary material for: A Five-Species Transcriptome Array for Oral Mixed-Biofilm Studies
Source: PubMed Central journal article supplement (PMC3237422; doi:10.1371/journal.pone.0027827), 2011-12-14
Supplement: pone.0027827.s010.pdf [file pone.0027827.s010.pdf]

**Supporting Information of "A five-species transcriptome array for oral mixed-biofilm studies"; Redanz *et al.* 2011**

Table S8: Primer designed for RT-PCR.

| primer name                                                    | sequence 5' - 3'      | gene info                                                          |
|----------------------------------------------------------------|-----------------------|--------------------------------------------------------------------|
| <u>RT-PCR primer for the gene with no change of expression</u> |                       |                                                                    |
| smu.2015_F:                                                    | GGTGATGCTGTGTCAAATGC  | rplE, 50S ribosomal protein L5                                     |
| smu.2015_R:                                                    | CCGGCGATTGATTTCTTAGC  |                                                                    |
| <u>RT-PCR primer for upregulated genes</u>                     |                       |                                                                    |
| smu.81_F:                                                      | GTTGCAAGAAGCACTTGAGC  | grpE, heat shock protein GrpE                                      |
| smu.81_R:                                                      | ACTTTGTCGCTCTTCATTAGC |                                                                    |
| smu.312_F:                                                     | CTATTGTTGACTGTGGTGGC  | PTS system, sorbitol phosphotransferase enzyme IIBC                |
| smu.312_R:                                                     | TGTATTGGGCTAAAGGTCCG  |                                                                    |
| smu.426_F:                                                     | AAAGGTCGAACCTCAGATGC  | copA, copper-transporting ATPase; P-type ATPase                    |
| smu.426_R:                                                     | GCACTTGCTCAATAGGAACC  |                                                                    |
| smu.956_F:                                                     | ACTGCTGAGATCTTAGCTCG  | clp, putative Clp-like ATP-dependent protease, ATP-binding subunit |
| smu.956_R:                                                     | TAACAATAGCCTGTGCTAAGC |                                                                    |
| smu.1495_F:                                                    | GGGACCTATGACTTTACACG  | lacB, galactose-6-phosphate isomerase subunit LacB                 |
| smu.1495_R:                                                    | GTACCGCACATACATACACC  |                                                                    |
| smu.1954_F:                                                    | GCTAACCCAATCGGTATTCG  | groEL, chaperonin GroEL                                            |
| smu.1954_R:                                                    | GCTTCTTTGCCAGAAACAGG  |                                                                    |
| smu.2047_R:                                                    | TGTCCTACCTTGAAACGAGC  | ptsG, putative PTS system, glucose-specific II ABC component       |
| smu.2047_F:                                                    | ACTTTGGTTAGCTTGGGTGC  |                                                                    |
| <u>RT-PCR primer for downregulated genes</u>                   |                       |                                                                    |
| smu.262_F:                                                     | CAAACCTCAACACGAACACG  | Otc, putative ornithin carbamoyltransferase                        |
| smu.262_R:                                                     | TCGTTTCATGACCTCCAAGC  |                                                                    |
| smu.498_F:                                                     | GGATCTATCTACTGTGCGAGC | comF, putative late competence protein                             |
| smu.498_R:                                                     | CTTAAGACCTGACCCTTTGG  |                                                                    |
| smu.772_F:                                                     | CTACTGAAGCAGAGAAGACC  | gbpD, putative glucan-binding protein D, BglB-like protein         |
| smu.772_R:                                                     | AACATTTCTACCATCAGCACC |                                                                    |

|              |                        |                                                      |
|--------------|------------------------|------------------------------------------------------|
| smu.1055_R:  | AAATCGCAGGTCATTCTCGC   | radC, putative DNA repair protein RadC               |
| smu.1055_F:  | AGACGATCTGTTGCTGAACC   |                                                      |
| smu.1340_F:  | ATACAGAAGTTATGCTACATGG | bacA2, putative surfactin synthetase                 |
| smu.1340_R:  | TATCAATGATAGATAGGCATGC |                                                      |
| smu.1934c_R: | CTGCCAAACTGACTCTTTGC   | putative cobalt ABC transporter, ABC-binding protein |
| smu.1934c_F: | GACAATGTTTGAGAGGGTGG   |                                                      |
