# Supplementary material for: A Five-Species Transcriptome Array for Oral Mixed-Biofilm Studies
Source: PLoS One. 2011 Dec 14;6(12):e27827. doi: 10.1371/journal.pone.0027827 (PMC3237422; doi:10.1371/journal.pone.0027827)
Supplement: Table S2 — Data set of crosshybridizing probes and the corresponding genes. (XLS) [file pone.0027827.s004.xls]

## Sheet: Tabelle3
Supporting Information of "A five-species transcriptome array for oral mixed-biofilm studies"; Redanz et al. 2011; Table S2:
The table presents declared biological false positive probes and the corresponding genes after single species hybridization. Signal intensity is more than two*random_mean.
hybridization with:	F. nucleatum ATCC 25586		S. mutans UA159		P. gingivalis W83		S. sanguinis SK36		A. actinomycetemcomitans HK1651
	PROBE_ID	GEN_ID	PROBE_ID	GEN_ID	PROBE_ID	GEN_ID	PROBE_ID	GEN_ID	PROBE_ID	GEN_ID
cross-reaction with:	AA00214P00581	AA00214	AA00084P00831	AA00084	AA00182P00470	AA00182	AA00182P00470	AA00182	FN0489P00679	FN0489
	AA00259P00385	AA00259	AA00182P00470	AA00182	AA00214P00581	AA00214	AA00214P00586	AA00214	FN0754P00438	FN0754
	AA00412P00074	AA00412	AA00208P00199	AA00208	AA00214P00586		AA00259P00398	AA00259	FN0754P00440
	AA00412P00083		AA00214P00581	AA00214	AA00259P00385	AA00259	AA00411P00331	AA00411	FN0754P00442
	AA00413P00117	AA00413	AA00214P00586		AA00259P00394		AA00412P00067	AA00412	FN0754P00447
	AA00413P00127		AA00259P00385	AA00259	AA00259P00398		AA00412P00069		FN0758P00859	FN0758
	AA00413P00129		AA00259P00394		AA00259P00400		AA00412P00071		FN1451P00048	FN1451
	AA00413P00131		AA00259P00398		AA00411P00190	AA00411	AA00412P00072		PG_0123P00028	PG_0123
	AA00620P00194	AA00620	AA00259P00400		AA00411P00194		AA00412P00073		PG_1252P00596	PG_1252
	AA00622P00117	AA00622	AA00399P00132	AA00399	AA00411P00331		AA00412P00074		PG_1252P00605
	AA00622P00131		AA00411P00190	AA00411	AA00412P00067	AA00412	AA00412P00075		PG_1252P00609
	AA00863P01171	AA00863	AA00411P00194		AA00412P00069		AA00412P00076		PG_1252P00623
	AA01567P00083	AA01567	AA00411P00331		AA00412P00071		AA00412P00078		PG_2209P00092	PG_2209
	AA01567P00088		AA00412P00067	AA00412	AA00412P00072		AA00412P00083		PG_2209P00102
	AA01567P00089		AA00412P00069		AA00412P00073		AA00413P00117	AA00413	PG_2209P00114
	AA02088P00233	AA02088	AA00412P00071		AA00412P00074		AA00413P00120		SMU_1508cP00981	SMU_1508c
	AA02156P00220	AA02156	AA00412P00072		AA00412P00075		AA00413P00127		SMU_1508cP00996
	AA02156P00226		AA00412P00073		AA00412P00076		AA00622P00117	AA00622	SMU_1508cP00999
	AA02335P00327	AA02335	AA00412P00074		AA00412P00078		AA00622P00127		SMU_1508cP01006
	AA02335P00342		AA00412P00075		AA00413P00117	AA00413	AA00622P00120		SMU_1508cP01013
	AA02421P00037	AA02421	AA00412P00076		AA00413P00120		AA01567P00054	AA01567	SMU_1508cP00990
	AA02421P00040		AA00412P00078		AA00505P00018	AA00505	AA01567P00072		SMU_1508cP00994
	AA02421P00043		AA00412P00083		AA00620P00190	AA00620	AA01567P00076		SMU_1736P00448	SMU_1736
	AA02421P00045		AA00413P00117	AA00413	AA00620P00194		AA01567P00082		SMU_2030P00149	SMU_2030
	PG_0523P00763	PG_0523	AA00413P00120		AA00622P00117	AA00622	AA01567P00083		SSA_0108P00229	SSA_0108
	PG_1715P02578	PG_1715	AA00413P00127		AA00622P00120		AA01567P00084		SSA_0468P00567	SSA_0468
	PG_1820P00048	PG_1820	AA00413P00129		AA01567P00054	AA01567	AA01567P00085		SSA_0843P00445	SSA_0843
	SMU_1508cP00996	SMU_1508c	AA00413P00131		AA01567P00072		AA01567P00088		SSA_0843P00450
	SMU_1508cP01013		AA00413P00134		AA01567P00076		AA01567P00089		SSA_0843P00454
	SMU_158P00609	SMU_158	AA00413P00138		AA01567P00082		AA01567P00090		SSA_0843P00456
	SMU_1781P00045	SMU_1781	AA00620P00190	AA00620	AA01567P00083		AA01567P00091		SSA_0843P00459
	SMU_2119P00476	SMU_2119	AA00620P00194		AA01567P00084		AA01567P00093		SSA_0843P00461
	SSA_0114P00108	SSA_0114	AA00622P00117	AA00622	AA01567P00085		AA02421P00039	AA02421	SSA_0843P00464
	SSA_0843P00459	SSA_0843	AA00622P00120		AA01567P00088		AA02421P00040		SSA_0843P00467
	SSA_1449P00491	SSA_1449	AA00622P00127		AA01567P00089		AA02421P00041		SSA_1399P00089	SSA_1399
	SSA_1498P00088	SSA_1498	AA00622P00131		AA01567P00090		AA02421P00042		SSA_1449P00491	SSA_1449
	SSA_1498P00101		AA00622P00134		AA01567P00091		AA02421P00043
	SSA_1520P00088	SSA_1520	AA00622P00138		AA01567P00093		AA02421P00044
	SSA_1854P00562	SSA_1854	AA01567P00054	AA01567	AA01759P00185	AA01759	AA02421P00045
	SSA_1854P01110		AA01567P00072		AA01881P00509	AA01881	AA02421P00046
	SSA_1854P01131		AA01567P00076		AA02421P00037	AA02421	AA02421P00048
	SSA_1992P00489	SSA_1992	AA01567P00082		AA02421P00039		AA02421P00053
	SSA_2026P00248	SSA_2026	AA01567P00083		AA02421P00040		FN1451P00048	FN1451
	SSA_2029P00172	SSA_2029	AA01567P00084		AA02421P00041		PG_0123P00028	PG_0123
	SSA_2029P00173		AA01567P00085		AA02421P00042		SMU_1508cP00994	SMU_1508c
	SSA_2040P00484	SSA_2040	AA01567P00088		AA02421P00043		SMU_1508cP00996
	SSA_2109P01445	SSA_2109	AA01567P00089		AA02421P00044		SMU_1508cP00999
	SSA_2288P00317	SSA_2288	AA01567P00090		AA02421P00045		SMU_1508cP01006
	SSA_2289P00181	SSA_2289	AA01567P00091		AA02421P00046		SMU_1508cP01013
	SSA_2289P00183		AA01567P00093		AA02421P00048		SMU_2002P00250	SMU_2002
	SSA_2289P00186		AA01759P00197	AA01759	FN0489P00679	FN0489	SMU_2009P00077	SMU_2009
	SSA_2292P00471	SSA_2292	AA01881P00509	AA01881	FN1198P01026	FN1198	SMU_2010P00101	SMU_2010
	SSA_2292P00475		AA02335P00324	AA02335	FN1451P00048	FN1451	SMU_2010P00105
	SSA_2389P00158	SSA_2389	AA02335P00330		FN1705P00080	FN1705	SMU_2010P00107
			AA02335P00333		SMU_1508cP00981	SMU_1508c	SMU_2010P00110
			AA02421P00037	AA02421	SMU_1508cP00990		SMU_2010P00115
			AA02421P00039		SMU_1508cP00994		SMU_2010P00126
			AA02421P00040		SMU_1508cP00996		SMU_99P00398	SMU_99
			AA02421P00041		SMU_1508cP00999
			AA02421P00042		SMU_1508cP01006
			AA02421P00043		SMU_1508cP01013
			AA02421P00044		SMU_1736P00448	SMU_1736
			AA02421P00045		SSA_0108P00229	SSA_0108
			AA02421P00046		SSA_0468P00567	SSA_0468
			AA02421P00048		SSA_0843P00445	SSA_0843
			AA02421P00051		SSA_0843P00450
			AA02421P00053		SSA_0843P00454
			AA02598P00293	AA02598	SSA_0843P00456
			FN0295P00013	FN0295	SSA_0843P00459
			FN0489P00679	FN0489	SSA_0843P00461
			FN0754P00447	FN0754	SSA_0843P00464
			FN0841P00187	FN0841	SSA_0843P00467
			FN1278P00130	FN1278	SSA_1055P00038	SSA_1055
			FN1451P00048	FN1451	SSA_1375P00194	SSA_1375
			FN1705P00080	FN1705
			FN1872P00137	FN1872
			FN1888P00211	FN1888
			FN2036P03211	FN2036
			FN2054P00412	FN2054
			PG_0123P00028	PG_0123
			PG_0303P00193	PG_0303
			PG_0344P00972	PG_0344
			PG_0672P00173	PG_0672
			PG_0739P00044	PG_0739
			PG_0986P00409	PG_0986
			PG_1114P00219	PG_1114
			PG_1252P00623	PG_1252
			PG_1367P00284	PG_1367
			PG_1392P00973	PG_1392
			PG_1693P00541	PG_1693
			PG_1715P02578	PG_1715
			PG_1820P00048	PG_1820
			PG_2161P00687	PG_2161
			PG_2163P00359	PG_2163
			PG_2209P00102	PG_2209
			RANDOM00000607	RANDOM_GC45_STRAIGHT
			SSA_0039P00343	SSA_0039
			SSA_0040P00618	SSA_0040
			SSA_0040P00759
			SSA_0106P00034	SSA_0106
			SSA_0106P00136
			SSA_0107P00032	SSA_0107
			SSA_0108P00205	SSA_0108
			SSA_0108P00229
			SSA_0110P00526	SSA_0110
			SSA_0111P00139	SSA_0111
			SSA_0111P00199
			SSA_0111P00201
			SSA_0112P00019	SSA_0112
			SSA_0112P00021
			SSA_0112P00023
			SSA_0112P00026
			SSA_0112P00029
			SSA_0113P00013	SSA_0113
			SSA_0116P00139	SSA_0116
			SSA_0116P00140
			SSA_0116P00156
			SSA_0117P00278	SSA_0117
			SSA_0117P00285
			SSA_0118P00156	SSA_0118
			SSA_0119P00476	SSA_0119
			SSA_0122P00002	SSA_0122
			SSA_0123P00096	SSA_0123
			SSA_0123P00101
			SSA_0123P00105
			SSA_0123P00110
			SSA_0123P00115
			SSA_0123P00126
			SSA_0123P00222
			SSA_0123P00236
			SSA_0123P00237
			SSA_0123P00238
			SSA_0123P00240
			SSA_0123P00243
			SSA_0123P00296
			SSA_0124P00082	SSA_0124
			SSA_0126P00355	SSA_0126
			SSA_0126P00362
			SSA_0126P00368
			SSA_0129P00150	SSA_0129
			SSA_0129P00159
			SSA_0131P00077	SSA_0131
			SSA_0131P00093
			SSA_0131P00101
			SSA_0131P00110
			SSA_0131P00130
			SSA_0131P00149
			SSA_0131P00199
			SSA_0131P00244
			SSA_0131P00276
			SSA_0133P00009	SSA_0133
			SSA_0211P00002	SSA_0211
			SSA_0266P00152	SSA_0266
			SSA_0330P01112	SSA_0330
			SSA_0338P00083	SSA_0338
			SSA_0413P00616	SSA_0413
			SSA_0437P00045	SSA_0437
			SSA_0437P00046
			SSA_0437P00048
			SSA_0437P00049
			SSA_0437P00050
			SSA_0437P00051
			SSA_0437P00053
			SSA_0437P00056
			SSA_0437P00057
			SSA_0437P00059
			SSA_0437P00231
			SSA_0440P00036	SSA_0440
			SSA_0440P00039
			SSA_0440P00042
			SSA_0440P00046
			SSA_0440P00049
			SSA_0440P00051
			SSA_0440P00053
			SSA_0440P00174
			SSA_0440P00177
			SSA_0440P00178
			SSA_0440P00179
			SSA_0440P00180
			SSA_0440P00181
			SSA_0468P00567	SSA_0468
			SSA_0683P00162	SSA_0683
			SSA_0772P00001	SSA_0772
			SSA_0791P01024	SSA_0791
			SSA_0813P00024	SSA_0813
			SSA_0820P00007	SSA_0820
			SSA_0820P00009
			SSA_0820P00012
			SSA_0820P00015
			SSA_0820P00018
			SSA_0820P00019
			SSA_0820P00021
			SSA_0820P00023
			SSA_0820P00024
			SSA_0820P00026
			SSA_0820P00027
			SSA_0820P00030
			SSA_0843P00445	SSA_0843
			SSA_0843P00450
			SSA_0843P00454
			SSA_0843P00456
			SSA_0843P00459
			SSA_0843P00461
			SSA_0843P00464
			SSA_0843P00467
			SSA_0847P00320	SSA_0847
			SSA_0886P00360	SSA_0886
			SSA_0886P00869
			SSA_0886P01129
			SSA_1061P00247	SSA_1061
			SSA_1061P00248
			SSA_1061P00249
			SSA_1062P00051	SSA_1062
			SSA_1104P00426	SSA_1104
			SSA_1105P00141	SSA_1105
			SSA_1232P01842	SSA_1232
			SSA_1272P00130	SSA_1272
			SSA_1272P00135
			SSA_1272P00144
			SSA_1272P00149
			SSA_1272P00155
			SSA_1272P00160
			SSA_1272P00166
			SSA_1304P00207	SSA_1304
			SSA_1360P00062	SSA_1360
			SSA_1362P00152	SSA_1362
			SSA_1373P01238	SSA_1373
			SSA_1375P00194	SSA_1375
			SSA_1433P00698	SSA_1433
			SSA_1449P00491	SSA_1449
			SSA_1498P00301	SSA_1498
			SSA_1499P00096	SSA_1499
			SSA_1499P00114
			SSA_1499P00117
			SSA_1499P00120
			SSA_1499P00123
			SSA_1500P00463	SSA_1500
			SSA_1520P00072	SSA_1520
			SSA_1520P00088
			SSA_1520P00133
			SSA_1520P00209
			SSA_1520P00662
			SSA_1520P01056
			SSA_1571P00195	SSA_1571
			SSA_1572P00131	SSA_1572
			SSA_1572P00253
			SSA_1572P00612
			SSA_1572P00619
			SSA_1572P00623
			SSA_1572P00627
			SSA_1572P00631
			SSA_1572P00636
			SSA_1577P00033	SSA_1577
			SSA_1605P00584	SSA_1605
			SSA_1622P00012	SSA_1622
			SSA_1622P00021
			SSA_1622P00030
			SSA_1622P00345
			SSA_1623P00341	SSA_1623
			SSA_1706P00438	SSA_1706
			SSA_2058P00057	SSA_2058
			SSA_2058P00061
			SSA_2058P00065
			SSA_2076P00115	SSA_2076
			SSA_2108P00079	SSA_2108
			SSA_2111P00315	SSA_2111
			SSA_2112P00024	SSA_2112
			SSA_2112P00027
			SSA_2112P00030
			SSA_2287P00002	SSA_2287
			SSA_2287P00012
			SSA_2391P00012	SSA_2391
			SSA_2391P00013
			SSA_2391P00014
			SSA_2391P00015
			SSA_2391P00016
			SSA_2391P00017
